# Supplementary material
Source: publisher figshare collection journal article supplement (https://gsajournals.figshare.com/ndownloader/files/23534993)
Supplement: Supplementary file 1 [file 23534993]

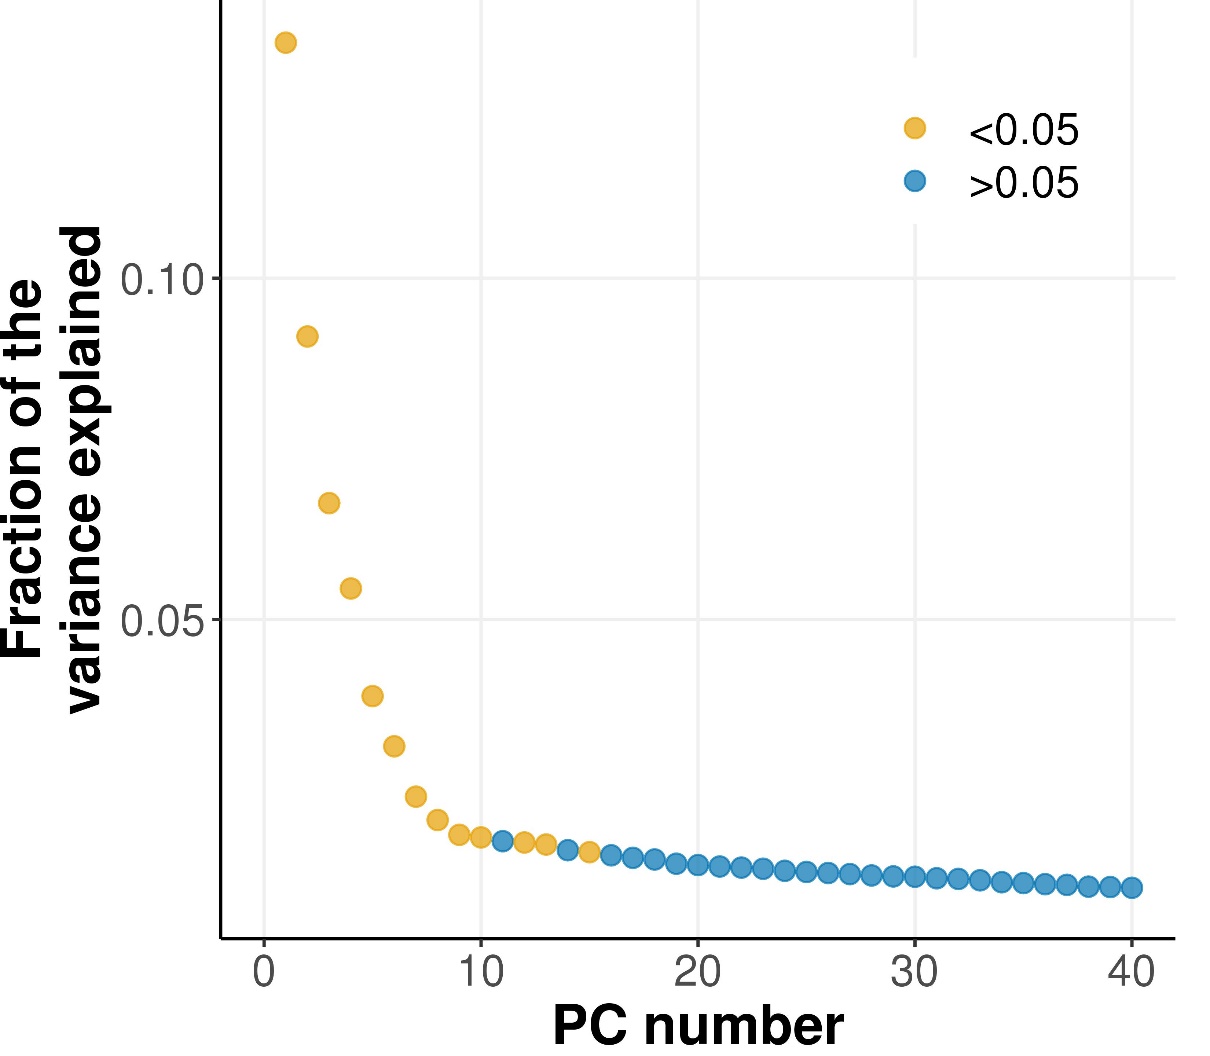


**Figure S3.** Fraction of the variance accounted for by the first 40 PCs derived from the genetic analysis of 125 individuals from different Nile tilapia strains / populations.
